# Supplementary material for: Breast-feeding and maternal risk of type 2 diabetes: a prospective study and meta-analysis
Source: Springer Nature journal article supplement (doi:10.1007/s00125-014-3247-3), 2014-04-30
Supplement: MOESM2 [file 8092276]

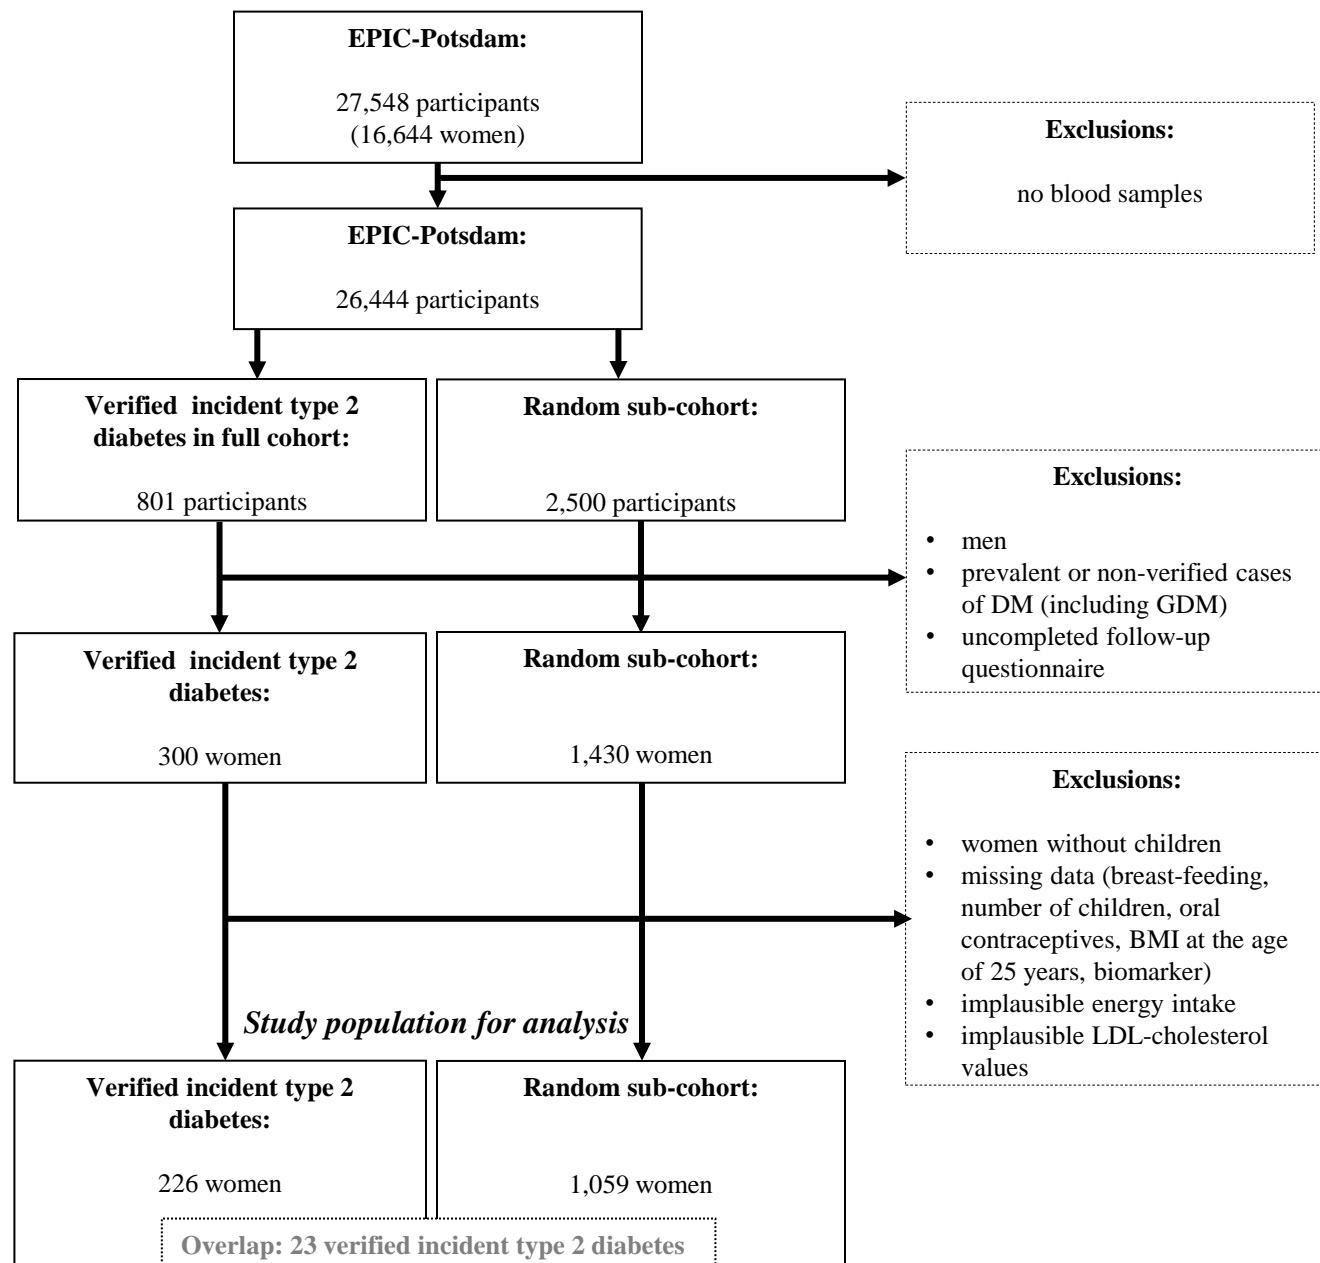

**ESM Figure 1** Case-cohort design within the EPIC-Potsdam study  
GDM, gestational diabetes mellitus; DM, diabetes mellitus
