# Supplementary material for: Breast-feeding and maternal risk of type 2 diabetes: a prospective study and meta-analysis
Source: Springer Nature journal article supplement (doi:10.1007/s00125-014-3247-3), 2014-04-30
Supplement: MOESM5 [file 8092276]

**ESM Figure 4** HRs (95% CIs) for association between duration of breast-feeding and type 2 diabetes.

Categories of breast-feeding duration (compared with no breast-feeding): breast-feeding vs non-breast-feeding (**a**), >0 to 3 months (**b**), >3 to 6 months (**c**), >6 to 11 months (**d**), >11 to 23 months (**e**), per additional year (**f**); Models are adjusted for potential confounders and baseline BMI. NHS, Nurses' Health Study; SWHS, Shanghai Women's Health Study

**a**

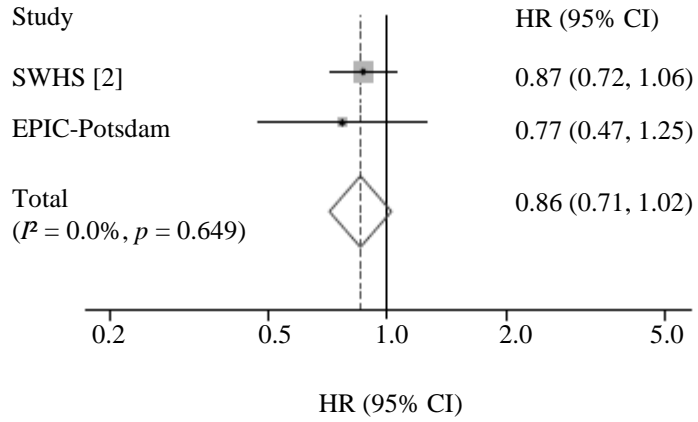

**b**

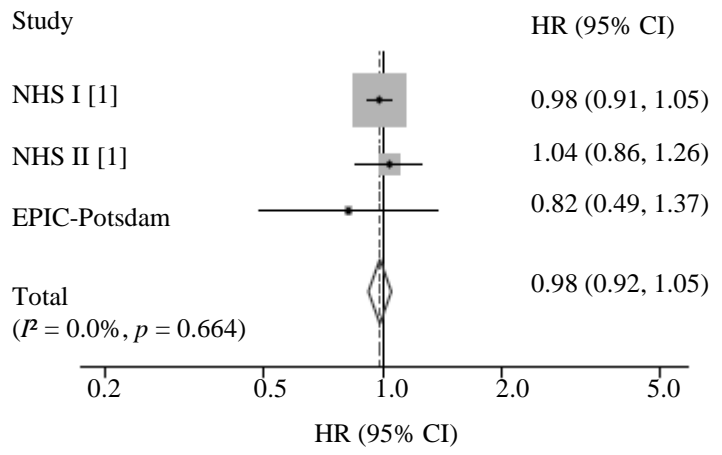

**c**

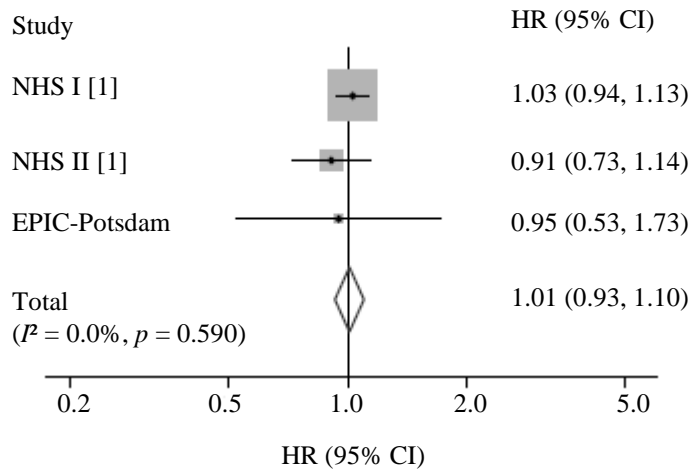

**d**

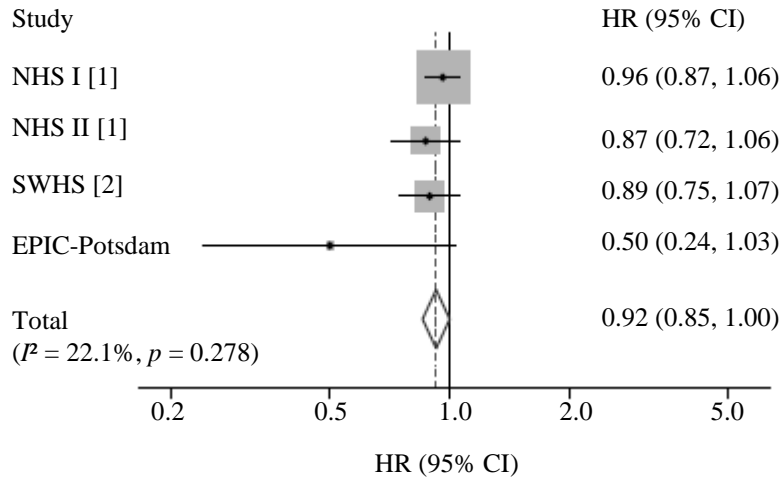

**e**

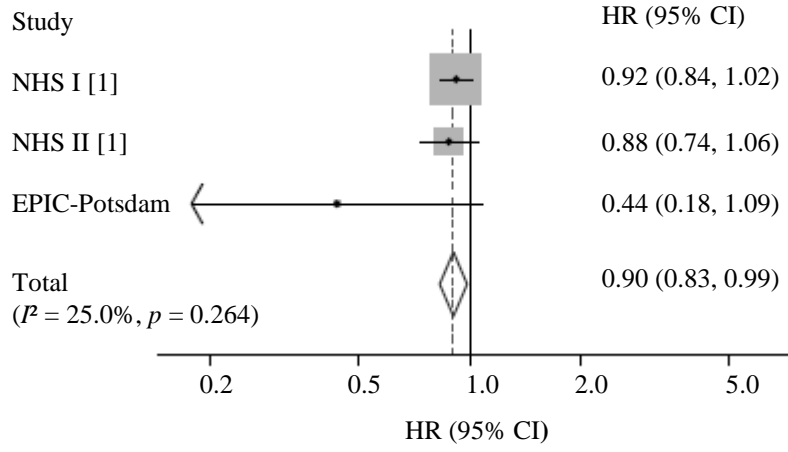

**f**

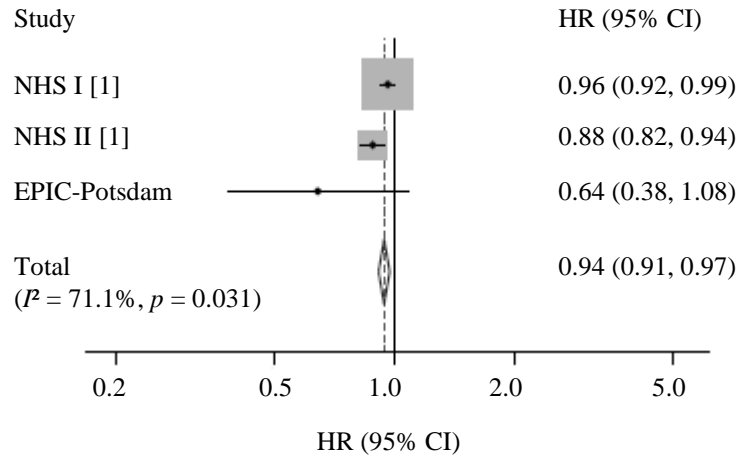

## References

- [1] Stuebe AM, Rich-Edwards JW, Willett WC, Manson JE, Michels KB (2005) Duration of lactation and incidence of type 2 diabetes. *JAMA* 294: 2601-2610
- [2] Villegas R, Gao YT, Yang G, et al. (2008) Duration of breast-feeding and the incidence of type 2 diabetes mellitus in the Shanghai Women's Health Study. *Diabetologia* 51: 258-266
