# Supplementary material for: Breast-feeding and maternal risk of type 2 diabetes: a prospective study and meta-analysis
Source: Diabetologia. 2014 May 1;57(7):1355–65. doi: 10.1007/s00125-014-3247-3 (PMC4052010; doi:10.1007/s00125-014-3247-3)
Supplement: Supplementary file 6 — (PDF 95 kb) [file 125_2014_3247_MOESM6_ESM.pdf]

**ESM Table 1** Quality assessment of prospective cohort studies on breast-feeding and diabetes risk

| Study                    |              | 1                                                          | 2                                | 3                                                      | 4                                                           | 5                                                 | 6                                                                                            | 7                                                             | 8                                                                                                      |
|--------------------------|--------------|------------------------------------------------------------|----------------------------------|--------------------------------------------------------|-------------------------------------------------------------|---------------------------------------------------|----------------------------------------------------------------------------------------------|---------------------------------------------------------------|--------------------------------------------------------------------------------------------------------|
|                          |              | Are the comparison groups from the same source population? | Is loss to follow-up rate < 20%? | Is breast-feeding duration assessed by questionnaires? | Is duration of exclusive breast-feeding duration available? | Is duration of breast-feeding assessed per child? | Is there a validation study for assessing validity of self-reported breast-feeding duration? | Are breast-feeding data assessments updated during follow-up? | Are self-reported diabetes cases confirmed by medical records, physicians or validated questionnaires? |
| Stuebe et al, 2005 [1]   | NHS I        | 1                                                          | 1                                | 1                                                      | 0                                                           | 0                                                 | 0                                                                                            | 0                                                             | 1                                                                                                      |
|                          | NHS II       | 1                                                          | 1                                | 1                                                      | 0                                                           | 1                                                 | 0                                                                                            | 1                                                             | 1                                                                                                      |
| Villegas et al, 2008 [2] | SWHS         | 1                                                          | 1                                | 1                                                      | 0                                                           | 1                                                 | 0                                                                                            | 0                                                             | 0                                                                                                      |
| present study, 2014      | EPIC-Potsdam | 1                                                          | 1                                | 1                                                      | 0                                                           | 1                                                 | 0                                                                                            | 0                                                             | 1                                                                                                      |

| Study                    |              | 9                                                  | 10                                                             | 11                                             | 12                                                                                              | 13                                                                                               | 14                                                                                             |                       |
|--------------------------|--------------|----------------------------------------------------|----------------------------------------------------------------|------------------------------------------------|-------------------------------------------------------------------------------------------------|--------------------------------------------------------------------------------------------------|------------------------------------------------------------------------------------------------|-----------------------|
|                          |              | Are prevalent diabetes cases excluded at baseline? | Is an accurate date of diagnosis available for diabetes cases? | Is the total follow-up duration $\geq 5$ years | Is Cox regression used to model associations between breast-feeding duration and diabetes risk? | Are age, nutritional factors and lifestyle practices controlled for in the statistical analysis? | Are reproductive factors controlled for in the statistical analysis? (e.g. number of children) | Overall quality score |
| Stuebe et al, 2005 [1]   | NHS I        | 1                                                  | 1                                                              | 1                                              | 1                                                                                               | 1                                                                                                | 1                                                                                              | 10                    |
|                          | NHS II       | 1                                                  | 1                                                              | 1                                              | 1                                                                                               | 1                                                                                                | 1                                                                                              | 12                    |
| Villegas et al, 2008 [2] | SWHS         | 1                                                  | 1                                                              | 0                                              | 1                                                                                               | 1                                                                                                | 0                                                                                              | 8                     |
| present study, 2014      | EPIC-Potsdam | 1                                                  | 1                                                              | 1                                              | 1                                                                                               | 1                                                                                                | 1                                                                                              | 11                    |

NHS, Nurses' Health Study; SWHS, Shanghai Women's Health Study  
This score was adapted from Hu et al. [3]

## References

- [1] Stuebe AM, Rich-Edwards JW, Willett WC, Manson JE, Michels KB (2005) Duration of lactation and incidence of type 2 diabetes. *JAMA* 294: 2601-2610
- [2] Villegas R, Gao YT, Yang G, et al. (2008) Duration of breast-feeding and the incidence of type 2 diabetes mellitus in the Shanghai Women's Health Study. *Diabetologia* 51: 258-266
- [3] Hu EA, Pan A, Malik V, Sun Q (2012) White rice consumption and risk of type 2 diabetes: meta-analysis and systematic review. *BMJ* 344: e1454-e1462
