# Supplementary material for: Breast-feeding and maternal risk of type 2 diabetes: a prospective study and meta-analysis
Source: Diabetologia. 2014 May 1;57(7):1355–65. doi: 10.1007/s00125-014-3247-3 (PMC4052010; doi:10.1007/s00125-014-3247-3)
Supplement: Supplementary file 7 — (PDF 91 kb) [file 125_2014_3247_MOESM7_ESM.pdf]

**ESM Table 2** Baseline characteristics of the EPIC-Potsdam case-cohort

| Characteristics                                           | Sub-cohort<br>(inclusive<br>internal cases) | Sub-cohort<br>(exclusive<br>internal cases) | All incident type<br>2 diabetes cases |
|-----------------------------------------------------------|---------------------------------------------|---------------------------------------------|---------------------------------------|
| n                                                         | 1059                                        | 1036                                        | 226                                   |
| Age at baseline, median (IQR)                             | 47.0 (17.0)                                 | 47.0 (16.0)                                 | 56.0 (11.0)                           |
| Marital status, %                                         |                                             |                                             |                                       |
| unmarried                                                 | 4.06                                        | 4.15                                        | 2.65                                  |
| married                                                   | 76.5                                        | 76.6                                        | 73.9                                  |
| divorced                                                  | 15.7                                        | 15.5                                        | 17.7                                  |
| widowed                                                   | 3.78                                        | 3.67                                        | 5.75                                  |
| Education, %                                              |                                             |                                             |                                       |
| no vocational training or in training                     | 4.53                                        | 4.44                                        | 10.62                                 |
| vocational training                                       | 37.0                                        | 36.5                                        | 46.5                                  |
| technical school                                          | 29.5                                        | 29.6                                        | 25.7                                  |
| technical college, university                             | 29.0                                        | 29.4                                        | 17.3                                  |
| Occupation, %                                             |                                             |                                             |                                       |
| sedentary occupation                                      | 62.8                                        | 62.6                                        | 61.1                                  |
| standing occupation and (heavy) manual work               | 37.2                                        | 37.4                                        | 38.9                                  |
| Smoking, %                                                |                                             |                                             |                                       |
| never smoker                                              | 58.5                                        | 58.9                                        | 56.6                                  |
| ex-smoker                                                 | 23.9                                        | 23.7                                        | 30.1                                  |
| smoker < 20 units/day                                     | 14.5                                        | 14.4                                        | 8.85                                  |
| smoker ≥ 20 units/day                                     | 3.21                                        | 3.09                                        | 4.42                                  |
| Physical Activity (h/week), median (IQR) <sup>a</sup>     | 2.00 (4.00)                                 | 2.00 (4.00)                                 | 1.50 (3.50)                           |
| Coffee consumption (ml/day), median (IQR)                 | 300 (386)                                   | 300 (300)                                   | 300 (300)                             |
| Red meat intake (g/day), median (IQR)                     | 31.3 (25.5)                                 | 31.3 (25.5)                                 | 34.8 (24.6)                           |
| Whole-grain bread intake (g/day), median (IQR)            | 32.6 (63.2)                                 | 33.2 (63.5)                                 | 30.9 (60.9)                           |
| Alcohol (g/day), median (IQR)                             | 5.16 (8.41)                                 | 5.16 (8.44)                                 | 3.78 (7.55)                           |
| Age at birth of first child, median (IQR)                 | 23.0 (4.00)                                 | 23.0 (4.00)                                 | 22.0 (5.00)                           |
| Age at birth of last child, mean (SD)                     | 26.9 (4.38)                                 | 26.9 (4.39)                                 | 27.1 (4.57)                           |
| Number of children, median (IQR)                          | 2 (1)                                       | 2 (1)                                       | 2 (2)                                 |
| Use of oral contraceptives, %                             |                                             |                                             |                                       |
| no use                                                    | 15.0                                        | 14.7                                        | 23.0                                  |
| ≤ 5 years                                                 | 18.6                                        | 18.6                                        | 20.8                                  |
| > 5 and ≤ 10 years                                        | 17.3                                        | 17.3                                        | 17.3                                  |
| > 10 years                                                | 49.1                                        | 49.4                                        | 38.9                                  |
| BMI at age of 25 years (kg/m <sup>2</sup> ), median (IQR) | 21.7 (3.18)                                 | 21.6 (3.09)                                 | 22.7 (4.13)                           |
| BMI at baseline (kg/m <sup>2</sup> ), median (IQR)        | 24.6 (5.56)                                 | 24.6 (5.41)                                 | 30.4 (6.35)                           |
| Waist circumference (cm), median (IQR)                    | 78.0 (15.0)                                 | 78.0 (14.5)                                 | 94.0 (15.5)                           |
| IQR, interquartile range                                  |                                             |                                             |                                       |

<sup>a</sup> Sum of biking and sporting activities in h/week.

A random sub-cohort of 2,500 individuals was selected from all participants with collected blood of the EPIC-Potsdam study population. Additionally, 849 incident type 2 diabetes cases were identified in the full cohort. 801 cases provided blood samples. After application of similar exclusion criteria 1059 women in the sub-cohort and 226 incident cases remained for this analysis. Because the sub-cohort is representative of the full cohort at baseline in case-cohort studies, the sub-cohort in our analyses included 23 women who developed incident type 2 diabetes during follow-up. These cases are termed as internal cases.
