# Supplementary material for: Breast-feeding and maternal risk of type 2 diabetes: a prospective study and meta-analysis
Source: Diabetologia. 2014 May 1;57(7):1355–65. doi: 10.1007/s00125-014-3247-3 (PMC4052010; doi:10.1007/s00125-014-3247-3)
Supplement: Supplementary file 9 — (PDF 151 kb) [file 125_2014_3247_MOESM9_ESM.pdf]

**ESM Table 4** HRs (95% CI) for type 2 diabetes by duration of breast-feeding stratified for number of children, time since last birth, age at birth of first child and educational level

|                                                        |                                         | Cumulative duration of breast-feeding |                      |                            |                             |                      | per additional<br>6 months of breast-<br>feeding |
|--------------------------------------------------------|-----------------------------------------|---------------------------------------|----------------------|----------------------------|-----------------------------|----------------------|--------------------------------------------------|
|                                                        |                                         | 0                                     | ≤ 3 weeks            | > 3 weeks to<br>< 2 months | ≥ 2 months to<br>< 6 months | ≥ 6 months           |                                                  |
| One child                                              | n (cases)                               | 19                                    | 9                    | 14                         | 18                          | 5                    | 65                                               |
|                                                        | Covariate-<br>adjusted HR <sup>a</sup>  | 1<br>(Ref.)                           | 0.77<br>(0.29, 2.04) | 0.69<br>(0.24, 2.00)       | 1.04<br>(0.46, 2.37)        | 0.49<br>(0.16, 1.48) | 0.83<br>(0.39, 1.76)                             |
| Two children                                           | n (cases)                               | 20                                    | 16                   | 14                         | 33                          | 20                   | 103                                              |
|                                                        | Covariate -<br>adjusted HR <sup>a</sup> | 1<br>(Ref.)                           | 0.66<br>(0.29, 1.47) | 0.42<br>(0.18, 0.95)       | 0.62<br>(0.30, 1.26)        | 0.31<br>(0.13, 0.73) | 0.77<br>(0.52, 1.15)                             |
| Three or more children                                 | n (cases)                               | 10                                    | 6                    | 10                         | 15                          | 17                   | 58                                               |
|                                                        | Covariate -<br>adjusted HR <sup>a</sup> | 1<br>(Ref.)                           | 2.15<br>(0.16, 29.1) | 0.18<br>(0.02, 1.43)       | 0.12<br>(0.02, 0.72)        | 0.07<br>(0.01, 0.47) | 0.72<br>(0.43, 1.19)                             |
| Time since last birth<br>< 20 years                    | n (cases)                               | 13                                    | 11                   | 7                          | 11                          | 6                    | 48                                               |
|                                                        | Covariate -<br>adjusted HR <sup>b</sup> | 1<br>(Ref.)                           | 0.68<br>(0.27, 1.75) | 0.23<br>(0.06, 0.82)       | 0.27<br>(0.10, 0.73)        | 0.27<br>(0.09, 0.77) | 0.67<br>(0.31, 1.46)                             |
| Time since last birth<br>≥ 20 years                    | n (cases)                               | 36                                    | 20                   | 31                         | 55                          | 36                   | 178                                              |
|                                                        | Covariate -<br>adjusted HR <sup>b</sup> | 1<br>(Ref.)                           | 0.76<br>(0.38, 1.52) | 0.67<br>(0.36, 1.26)       | 0.76<br>(0.43, 1.33)        | 0.32<br>(0.16, 0.63) | 0.73<br>(0.55, 0.97)                             |
| Age at birth of first child<br>≤ 24 years <sup>c</sup> | n (cases)                               | 27                                    | 25                   | 29                         | 52                          | 34                   | 167                                              |
|                                                        | Covariate-<br>adjusted HR <sup>b</sup>  | 1<br>(Ref.)                           | 0.96<br>(0.50, 1.83) | 0.64<br>(0.34, 1.19)       | 0.72<br>(0.41, 1.27)        | 0.33<br>(0.17, 0.65) | 0.74<br>(0.55, 1.00)                             |
|                                                        | + BMI at age 25                         | 1<br>(Ref.)                           | 1.08<br>(0.56, 2.09) | 0.67<br>(0.36, 1.24)       | 0.82<br>(0.46, 1.46)        | 0.35<br>(0.18, 0.69) | 0.72<br>(0.53, 0.99)                             |
| Age at birth of first child<br>≥ 26 years <sup>c</sup> | n (cases)                               | 20                                    | 3                    | 7                          | 10                          | 4                    | 44                                               |
|                                                        | Covariate -<br>adjusted HR <sup>b</sup> | 1<br>(Ref.)                           | 0.19<br>(0.04, 0.97) | 0.29<br>(0.07, 1.17)       | 0.24<br>(0.06, 1.06)        | 0.09<br>(0.02, 0.36) | 0.40<br>(0.19, 0.85)                             |
|                                                        | + BMI at age 25                         | 1<br>(Ref.)                           | 0.25<br>(0.04, 1.39) | 0.24<br>(0.05, 1.13)       | 0.43<br>(0.09, 1.95)        | 0.10<br>(0.02, 0.45) | 0.47<br>(0.22, 1.02)                             |

|                      |                                         | Cumulative duration of breast-feeding |                      |                             |                      | per additional<br>6 months of breast-<br>feeding |
|----------------------|-----------------------------------------|---------------------------------------|----------------------|-----------------------------|----------------------|--------------------------------------------------|
|                      |                                         | 0                                     | < 2 months           | ≥ 2 months to<br>< 6 months | ≥ 6 months           |                                                  |
| University degree    | n (cases)                               | 9                                     | 9                    | 10                          | 11                   | 39                                               |
|                      | Covariate-<br>adjusted HR <sup>d</sup>  | 1<br>(Ref.)                           | 0.45<br>(0.12, 1.69) | 0.37<br>(0.07, 2.04)        | 0.44<br>(0.13, 1.50) | 0.94<br>(0.59, 1.51)                             |
| No university degree | n (cases)                               | 40                                    | 60                   | 56                          | 31                   | 187                                              |
|                      | Covariate -<br>adjusted HR <sup>d</sup> | 1<br>(Ref.)                           | 0.75<br>(0.45, 1.25) | 0.72<br>(0.42, 1.24)        | 0.28<br>(0.15, 0.54) | 0.68<br>(0.50, 0.91)                             |

<sup>a</sup> Adjusted for age at baseline, marital status, education, occupation, smoking, sport, cycling, alcohol intake, coffee consumption, intake of red meat, intake of whole-grain bread, age at birth of last child, duration of oral contraceptive use.

<sup>b</sup> Adjusted for age at baseline, marital status, education, occupation, smoking, sport, cycling, alcohol intake, coffee consumption, intake of red meat, intake of whole-grain bread, number of children, duration of oral contraceptive use.

<sup>c</sup> case-cohort with 1161 women (211 cases); 101 Women who gave first birth at the age of 25 were excluded from original case-cohort.

<sup>d</sup> Adjusted for age at baseline, marital status, occupation, smoking, sport, cycling, alcohol intake, coffee consumption, intake of red meat, intake of whole-grain bread, age at birth of last child, number of children, duration of oral contraceptive use.
